# Supplementary material for: Not all animals need a microbiome
Source: Oxford University Press journal article supplement (doi:10.1093/femsle/fnz117), 2019-05-01
Supplement: fnz117_supplemental_file.docx [file fnz117_supplemental_file.docx]

**Table S1.** A selection of 45 quotations that, implicitly or explicitly, convey the view that all animals host and depend upon a microbiome.

| **Quotation** | **Reference** |
| --- | --- |
| Like all animals, butterflies also host internal communities of microorganisms... | Hammer, T. J., McMillan, W. O. & Fierer, N. 2014 Metamorphosis of a butterfly-associated bacterial community. PLoS One 9, e86995. |
| Mammals host gut microbiomes that are immensely important to the health, and likely fitness, of the host. | Sanders, J. G., Beichman, A. C., Roman, J., Scott, J. J., Emerson, D., McCarthy, J. J. & Girguis, P. R. 2015 Baleen whales host a unique gut microbiome with similarities to both carnivores and herbivores. Nat. Commun. 6, 8285. (doi:10.1038/ncomms9285) |
| Like nearly all plants and animals, humans host a large number of microorganisms... | Fierer, N. et al. 2011 From Animalcules to an Ecosystem: Application of Ecological Concepts to the Human Microbiome. Annu. Rev. Ecol. Evol. Syst. 43, 120830113150004. (doi:10.1146/annurev-ecolsys-110411-160307) |
| Animals and plants are no longer viewed as autonomous entities, but rather as "holobionts"...Symbiotic microbes are fundamental to nearly every aspect of host form, function, and fitness... | Bordenstein, S. R. & Theis, K. R. 2015 Host biology in light of the microbiome: Ten principles of holobionts and hologenomes. PLoS Biol. 13, e1002226. (doi:10.1371/journal.pbio.1002226) |
| Today we realize that any multicellular organism must be considered a metaorganism comprising the macroscopic host and its synergistic interdependence with bacteria, archaea, fungi, and numerous other microbial and eukaryotic species including algal symbionts. | Bosch, T. C. G. & McFall-Ngai, M. J. 2011 Metaorganisms as the new frontier. Zoology 114, 185–190. (doi:10.1016/j.zool.2011.04.001) |
| The gut microbiota of animals exert major effects on host biology. | Bourguignon, T., Lo, N., Dietrich, C., Šobotník, J., Sidek, S., Roisin, Y., Brune, A. & Evans, T. A. 2018 Rampant Host Switching Shaped the Termite Gut Microbiome. Curr. Biol. 0, 1–6. (doi:10.1016/j.cub.2018.01.035) |
| The host-microbiome supraorganism appears to have coevolved and the unperturbed microbial component of the dyad renders host health sustainable. This coevolution has likely shaped evolving phenotypes in all life forms... | Dominguez-Bello, M. G., Godoy-Vitorino, F., Knight, R. & Blaser, M. J. 2019 Role of the microbiome in human development. Gut , gutjnl-2018-317503. (doi:10.1136/gutjnl-2018-317503) |
| Eukaryotes do not live alone. They bear living cells of bacteria (Eubacteria and Archaea), and often eukaryotic microorganisms, on their surfaces and internally... | Douglas, A. E. 2014 Symbiosis as a general principle in eukaryotic evolution. Cold Spring Harb. Perspect. Biol. 6, 1–14. (doi:10.1101/cshperspect.a016113) |
| Animals establish mutually beneficial interactions with micro-organisms. This is particularly true for commensal bacterial communities that colonize the intestinal tract of most animal species. | Erkosar, B. & Leulier, F. 2014 Transient adult microbiota, gut homeostasis and longevity: Novel insights from the Drosophila model. FEBS Lett. 588, 4250–4257. (doi:10.1016/j.febslet.2014.06.041) |
| Animals are colonized by coevolved bacterial communities, which contribute to the host’s health. | Franzenburg, S., Walter, J., Kunzel, S., Wang, J., Baines, J. F., Bosch, T. C. G. & Fraune, S. 2013 Distinct antimicrobial peptide expression determines host species-specific bacterial associations. Proc. Natl. Acad. Sci. 110, E3730–E3738. (doi:10.1073/pnas.1304960110) |
| Animals cannot be considered individuals by anatomical or physiological criteria because a diversity of symbionts are both present and functional in completing metabolic pathways and serving other physiological functions. Similarly, ...animal development is incomplete without symbionts. | Gilbert, S. F., Sapp, J. & Tauber, A. I. 2012 A symbiotic view of life: We have never been individuals. Q. Rev. Biol. 87, 325–341. (doi:http://www.jstor.org/stable/10.1086/668166) |
| All animals have associated microbial communities called microbiomes that influence the physiology and fitness of their host. | Gould, A. L., Zhang, V., Lamberti, L., Jones, E. W., Obadia, B., Gavryushkin, A., Carlson, J. M., Beerenwinkel, N. & Ludington, W. B. 2018 Microbiome interactions shape host fitness. Proc. Natl. Acad. Sci. 115, E11951–E11960. (doi:10.1101/232959) |
| …animal guts are colonized by diverse microbial classes, including bacteria and archaea, fungi, oomycetes, as well as viruses. These communities can be regarded as the host’s extended genome, providing a huge range of potential functional capacities. | Hacquard, S. et al. 2015 Microbiota and Host Nutrition across Plant and Animal Kingdoms. Cell Host Microbe 17, 603–616. (doi:10.1016/j.chom.2015.04.009) |
| Eukaryotic hosts generally obtain fitness benefits through association with specific microbes. | Hoang, K. L., Gerardo, N. M., Morran, L. T. 2019 The effects of Bacillus subtilis on Caenorhabditis elegans fitness after heat stress. Ecol Evol 9, 3491-9. (doi:10.1002/ece3.4983) |
| All multicellular organisms benefit from their own microbiota, which play important roles in maintaining the host nutritional health and immunity. | Ikeda-Ohtsubo W, Brugman S, Warden CH et al. 2018 How Can We Define “Optimal Microbiota?”: A Comparative Review of Structure and Functions of Microbiota of Animals, Fish, and Plants in Agriculture. Front Nutr 5, 1–18. |
| Virtually every multicellular organism hosts beneficial microbes. | Janson, E. M., Stireman, J. O., Singer, M. S. & Abbot, P. 2008 Phytophagous insect-microbe mutualisms and adaptive evolutionary diversification. Evolution 62, 997–1012. (doi:10.1111/j.1558-5646.2008.00348.x) |
| Virtually all animals have a gut which is partly to nearly totally (ruminants) filled with a complex coterie of other organisms (microbes, yeast, nematodes, protozoans, etc.). | Janzen DH. The natural history of mutualisms. In: Boucher DH (ed.). The Biology of Mutualism. Oxford University Press, 1985, 40–99. |
| Virtually all animals associate with smaller organisms, primarily prokaryotes (bacteria and archaea) that digest complex organic substrates, fix CO2, fix N2, stimulate ontogeny, affect behaviour, compete against pathogens, synthesize growth factors or serve as prey. | Kieft, T. L. & Simmons, K. A. 2015 Allometry of animal-microbe interactions and global census of animal-associated microbes. Proc. R. Soc. B 282, 20150702. (doi:10.1098/rspb.2015.0702) |
| ...abundant and diverse microbial communities living in and on eukaryotic hosts are of paramount importance to the organismal phenotype, influencing everything from pathogen susceptibility and autoimmunity, to nutrient acquisition and metabolism, range expansion, and an organism’s ability to cope with stressful environments. | Koskella, B., Hall, L. J. & Metcalf, C. J. E. 2017 The microbiome beyond the horizon of ecological and evolutionary theory. Nat. Ecol. Evol. 1, 1606–1615. (doi:10.1038/s41559-017-0340-2) |
| The digestive tracts of animals are inhabited by a taxonomically and functionally diverse community of microorganisms, dominated by mutualistic and commensal prokaryotes, viruses and fungi. | Kropáčková L. Co-diversification of gastrointestinal microbiota and phylogeny in passerines is not explained by ecological divergence. Mol Ecol 2017, DOI: 10.1111/ijlh.12426. |
| Complex ecosystems have been forged by co-adaptation over millennia between animals and microbes to create stable and specific microbiomes... | Lee, S. M., Donaldson, G. P., Mikulski, Z., Boyajian, S., Ley, K. & Mazmanian, S. K. 2013 Bacterial colonization factors control specificity and stability of the gut microbiota. Nature 501, 426–429. (doi:10.1038/nature12447) |
| Gut microbiota is found in virtually any metazoan, from invertebrates to vertebrates. | Lee, W.-J. & Hase, K. 2014 Gut microbiota–generated metabolites in animal health and disease. Nat. Chemi 10, 416–424. |
| All animals live in intimate association with communities of microorganisms, known as microbiota, composed of bacteria, archaea, anaerobic fungi, protozoa, and viruses. | Macke, E., Tasiemski, A., Massol, F., Callens, M. & Decaestecker, E. 2017 Life history and eco-evolutionary dynamics in light of the gut microbiota. Oikos 126, 508–531. (doi:10.1111/oik.03900) |
| Virtually all eukaryotes associate with mutualistic bacteria. | Maire, J., Vincent-Monégat, C., Balmand, S. et al. 2019 Weevil pgrp-lb prevents endosymbiont TCT dissemination and chronic host systemic immune activation. Proc. Natl. Acad. Sci. 116, 5623-32. (doi:10.1073/pnas.1821806116) |
| A staggering number of microbes lives on and in cell tissues of eukaryotic organisms, thereby influencing the functioning and evolution of their host. | Mendes, R. & Raaijmakers, J. M. 2015 Cross-kingdom similarities in microbiome functions. ISME J. 9, 1905–1907. (doi:10.1038/ismej.2015.7) |
| Insect symbionts are critical players in all aspects of host ecology, reproduction and evolution. | Moran, N. A., McCutcheon, J. P. & Nakabachi, A. 2008 Genomics and evolution of heritable bacterial symbionts. Annu. Rev. Genet. 42, 165–90. (doi:10.1146/annurev.genet.41.110306.130119) |
| Coelomate animals...have coevolved with a diverse range of symbiotic gut bacteria and other 26microorganisms collectively known as the gut microbiota. | Nicholson, J. K., Holmes, E., Kinross, J., Burcelin, R., Gibson, G., Jia, W. & Pettersson, S. 2012 Host-gut microbiota metabolic interactions. Science 336, 1262–7. (doi:10.1126/science.1223813) |
| Almost every living macroorganism has symbiotic interactions with microorganisms... | Nougué, O., Gallet, R., Chevin, L.-M. & Lenormand, T. 2015 Niche limits of symbiotic gut microbiota constrain the salinity tolerance of brine shrimp. Am. Nat. 186, 390–403. (doi:10.1086/682370) |
| Animals, including humans, live together with complex bacterial communities in their gut that influence their physiology and health. | Pais, I. S., Valente, R. S., Sporniak M. et al. Drosophila melanogaster establishes a species-specific mutualistic interaction with stable gut-colonizing bacteria. PLOS Biol. 2018;16:e2005710. (doi: 10.1371/journal.pbio.2005710) |
| It is increasingly recognized that all animals are chronically infected by microorganisms, and that the resident microbiota, especially the substantial microbial community in the alimentary tract, has major effects on nutrient processing, metabolic signaling and, ultimately, the health and well-being of the animal host | Ridley, E. V., Wong, AC-N., Westmiller, S. et al. Impact of the resident microbiota on the nutritional phenotype of Drosophila melanogaster. PLoS One 2012;7:e36765. |
| Microbial symbioses with eukaryotic hosts are ubiquitous. | Rio, R. V. M., Symula, R. E., Wang, J. et al. 2012 Insight into the Transmission Biology and Species-Specific Functional Capabilities of Tsetse (Diptera: Glossinidae) Obligate Symbiont Wigglesworthia. MBio 3, e00240-11. (doi:10.1128/mBio.00240-11) |
| All animals live in intimate association with microorganisms that profoundly influence their health and development… | Robinson, C. D., Klein, H. S., Murphy, K. D., Parthasarathy, R., Guillemin, K. & Bohannan, B. J. M. 2018 Experimental bacterial adaptation to the zebrafish gut reveals a primary role for immigration. PLOS Biol. 16, e2006893. (doi:10.1371/journal.pbio.2006893) |
| Host-associated communities are essential for a number of functions. Host development and health are dependent on the presence of an intact microbial community..... | Robinson, C. J., Bohannan, B. J. M. & Young, V. B. 2010 From structure to function: the ecology of host-associated microbial communities. Microbiol. Mol. Biol. Rev. 74, 453–76. (doi:10.1128/MMBR.00014-10) |
| All animals and plants harbor abundant and diverse microbiota and are thus considered holobionts. | Rosenberg, E. & Zilber-Rosenberg, I. 2018 The hologenome concept of evolution after 10 years. Microbiome 6, 78. (doi:10.1186/s40168-018-0457-9) |
| In recent years, it has become common knowledge that we, and the many organisms around us, are symbiotic creatures, harbouring large numbers of internal and external microbial residents. | Russell, J. A., Dubilier, N. & Rudgers, J. A. 2014 Nature’s microbiome: Introduction. Mol. Ecol. 23, 1225–1237. (doi:10.1111/mec.12676) |
| Gut microbial communities are important for diverse host functions, including development, fecundity, metabolism, immunity, and even behavior, contributing to both host health and fitness. | Shapira, M. 2016 Gut Microbiotas and Host Evolution: Scaling Up Symbiosis. Trends Ecol. Evol. 31, 539–549. (doi:10.1016/j.tree.2016.03.006) |
| The intestinal microbiome of animals is essential for health, contributing to digestion of foods, proper immune development, inhibition of pathogen colonization, and catabolism of xenobiotic compounds. | Sherrill-Mix, S. et al. 2018 Allometry and Ecology of the Bilaterian Gut Microbiome. MBio 9, e00319-18. (doi:10.1128/mBio.00319-18) |
| The animal gastrointestinal tract houses a large microbial community, the gut microbiota, that confers many benefits to its host, such as protection from pathogens and provision of essential metabolites. | Tang, Y., Underwood, A., Gielbert, A., Woodward, M. J. & Petrovska, L. 2014 Metaproteomics Analysis Reveals the Adaptation Process for the Chicken Gut Microbiota. Appl. Environ. Microbiol. 80, 478–485. (doi:10.1128/AEM.02472-13) |
| All animals harbor beneficial microbes. | Theis, K. R., Venkataraman, A., Dycus, J. A. et al. 2013 Symbiotic bacteria appear to mediate hyena social odors. Proc. Natl. Acad. Sci. 110, 19832-7. (doi: 10.1073/pnas.1306477110) |
| Host-associated microbiota—the archaeal, bacterial, fungal and viral communities residing on and inside organisms—profoundly influence host health through their impacts on the immune system, digestion, development and even behaviour. | Trevelline, B. K., Fontaine, S. S., Hartup, B. K. & Kohl, K. D. 2019 Conservation biology needs a microbial renaissance: a call for the consideration of host-associated microbiota in wildlife management practices. Proc. R. Soc. B Biol. Sci. 286, 20182448. (doi:10.1098/rspb.2018.2448) |
| Symbiotic associations between animals and microorganisms are omnipresent and can play a fundamental role in animal evolution. | van Veelen HPJ, Falcao Salles J, Tieleman BI. Multi-level comparisons of cloacal, skin, feather and nest-associated microbiota suggest considerable influence of horizontal acquisition on the microbiota assembly of sympatric woodlarks and skylarks. Microbiome 2017;5:156. |
| Host-associated microbes are ubiquitous. Every multicellular eukaryote, and even many unicellular eukaryotes (protists), hosts a diverse community of microbes. | Wegener Parfrey, L. 2015 Mock communities highlight the diversity of host-associated eukaryotes. Mol. Ecol. 24, 4337–4339. (doi:10.1111/mec.13311) |
| Microorganisms play vital roles in the growth and maintenance of healthy multicellular organisms, including neurological and immune system development, gut nutrition, and pathogen defence. | West, A. G., Waite, D. W., Deines, P., Bourne, D. G., Digby, A., McKenzie, V. J. & Taylor, M. W. 2019 The microbiome in threatened species conservation. Biol. Conserv. 229, 85–98. (doi:10.1016/j.biocon.2018.11.016) |
| All animals studied to date are associated with symbiotic communities of microorganisms. | Zaneveld, J. R., McMinds, R. & Vega Thurber, R. 2017 Stress and stability: applying the Anna Karenina principle to animal microbiomes. Nat. Microbiol. 2, 17121. (doi:10.1038/nmicrobiol.2017.121) |
| The central role symbiosis plays in the ecology and evolution of eukaryotic organisms is now unquestioned. | Zimmermann, J. et al. 2016 Closely coupled evolutionary history of ecto-and endosymbionts from two distantly related animal phyla. Mol. Ecol. 25, 3203–3223. (doi:10.1111/mec.13554) |
